# Supplementary material for: A miR-JL-5 inhibitor modulates the proliferation of Nosema ceranae in Apis cerana
Source: Front Insect Sci. 2025 Jun 4;5:1583941. doi: 10.3389/finsc.2025.1583941 (PMC12174399; doi:10.3389/finsc.2025.1583941)
Supplement: Supplementary Table 2 — Apis cerana target genes for miR-JL-5. [file Table2.xlsx]

## Sheet: Sheet1
csi-miRJL5	g1001.t1
csi-miRJL5	g8677.t1
csi-miRJL5	g10046.t1
csi-miRJL5	g10048.t1
csi-miRJL5	g10070.t1
csi-miRJL5	g10081.t1
csi-miRJL5	g10085.t1
csi-miRJL5	g10088.t1
csi-miRJL5	g1008.t1
csi-miRJL5	g100.t1
csi-miRJL5	g10102.t1
csi-miRJL5	g10108.t1
csi-miRJL5	g10143.t1
csi-miRJL5	g10149.t1
csi-miRJL5	g10156.t1
csi-miRJL5	g1015.t1
csi-miRJL5	g10164.t1
csi-miRJL5	g10215.t1
csi-miRJL5	g10218.t1
csi-miRJL5	g1021.t1
csi-miRJL5	g1023.t1
csi-miRJL5	g10243.t1
csi-miRJL5	g10246.t1
csi-miRJL5	g10270.t1
csi-miRJL5	g10272.t1
csi-miRJL5	g1029.t1
csi-miRJL5	g10303.t1
csi-miRJL5	g10319.t1
csi-miRJL5	g10337.t1
csi-miRJL5	g10353.t1
csi-miRJL5	g10361.t1
csi-miRJL5	g10364.t1
csi-miRJL5	g10365.t1
csi-miRJL5	g1038.t1
csi-miRJL5	g10434.t1
csi-miRJL5	g10447.t1
csi-miRJL5	g10450.t1
csi-miRJL5	g10457.t1
csi-miRJL5	g10459.t1
csi-miRJL5	g10475.t1
csi-miRJL5	g10486.t1
csi-miRJL5	g10503.t1
csi-miRJL5	g10504.t1
csi-miRJL5	g10519.t1
csi-miRJL5	g10522.t1
csi-miRJL5	g10526.t1
csi-miRJL5	g10537.t1
csi-miRJL5	g1054.t1
csi-miRJL5	g10558.t1
csi-miRJL5	g10581.t1
csi-miRJL5	g10591.t1
csi-miRJL5	g10599.t1
csi-miRJL5	g10610.t1
csi-miRJL5	g10666.t1
csi-miRJL5	g10679.t1
csi-miRJL5	g1067.t1
csi-miRJL5	g10705.t1
csi-miRJL5	g10714.t1
csi-miRJL5	g10723.t1
csi-miRJL5	g1086.t1
csi-miRJL5	g1102.t1
csi-miRJL5	g1108.t1
csi-miRJL5	g1124.t1
csi-miRJL5	g1128.t1
csi-miRJL5	g1139.t1
csi-miRJL5	g114.t1
csi-miRJL5	g1156.t1
csi-miRJL5	g1165.t1
csi-miRJL5	g1172.t1
csi-miRJL5	g1173.t1
csi-miRJL5	g117.t1
csi-miRJL5	g1181.t1
csi-miRJL5	g1197.t1
csi-miRJL5	g1201.t1
csi-miRJL5	g1233.t1
csi-miRJL5	g1258.t1
csi-miRJL5	g1265.t1
csi-miRJL5	g1268.t1
csi-miRJL5	g1283.t1
csi-miRJL5	g1285.t1
csi-miRJL5	g1300.t1
csi-miRJL5	g131.t1
csi-miRJL5	g1342.t1
csi-miRJL5	g1349.t1
csi-miRJL5	g1362.t1
csi-miRJL5	g1363.t1
csi-miRJL5	g1366.t1
csi-miRJL5	g1369.t1
csi-miRJL5	g1371.t1
csi-miRJL5	g1378.t1
csi-miRJL5	g139.t1
csi-miRJL5	g1423.t1
csi-miRJL5	g1444.t1
csi-miRJL5	g1455.t1
csi-miRJL5	g1463.t1
csi-miRJL5	g1479.t1
csi-miRJL5	g1485.t1
csi-miRJL5	g1500.t1
csi-miRJL5	g1504.t1
csi-miRJL5	g1512.t1
csi-miRJL5	g1519.t1
csi-miRJL5	g1532.t1
csi-miRJL5	g1537.t1
csi-miRJL5	g1549.t1
csi-miRJL5	g1559.t1
csi-miRJL5	g1572.t1
csi-miRJL5	g1589.t1
csi-miRJL5	g1600.t1
csi-miRJL5	g1619.t1
csi-miRJL5	g1634.t1
csi-miRJL5	g1635.t1
csi-miRJL5	g1650.t1
csi-miRJL5	g1672.t1
csi-miRJL5	g1705.t1
csi-miRJL5	g1712.t1
csi-miRJL5	g171.t1
csi-miRJL5	g1732.t1
csi-miRJL5	g1746.t1
csi-miRJL5	g1755.t1
csi-miRJL5	g1761.t1
csi-miRJL5	g180.t1
csi-miRJL5	g1814.t1
csi-miRJL5	g1824.t1
csi-miRJL5	g182.t1
csi-miRJL5	g1844.t1
csi-miRJL5	g1850.t1
csi-miRJL5	g1894.t1
csi-miRJL5	g1898.t1
csi-miRJL5	g1899.t1
csi-miRJL5	g1900.t1
csi-miRJL5	g1925.t1
csi-miRJL5	g194.t1
csi-miRJL5	g1954.t1
csi-miRJL5	g1964.t1
csi-miRJL5	g1972.t1
csi-miRJL5	g201.t1
csi-miRJL5	g2034.t1
csi-miRJL5	g2050.t1
csi-miRJL5	g2069.t1
csi-miRJL5	g206.t1
csi-miRJL5	g2070.t1
csi-miRJL5	g2086.t1
csi-miRJL5	g2094.t1
csi-miRJL5	g2097.t1
csi-miRJL5	g2123.t1
csi-miRJL5	g212.t1
csi-miRJL5	g2132.t1
csi-miRJL5	g2133.t1
csi-miRJL5	g2138.t1
csi-miRJL5	g2187.t1
csi-miRJL5	g2199.t1
csi-miRJL5	g2207.t1
csi-miRJL5	g2210.t1
csi-miRJL5	g2242.t1
csi-miRJL5	g2273.t1
csi-miRJL5	g228.t1
csi-miRJL5	g2298.t1
csi-miRJL5	g2299.t1
csi-miRJL5	g22.t1
csi-miRJL5	g2310.t1
csi-miRJL5	g2332.t1
csi-miRJL5	g2341.t1
csi-miRJL5	g2342.t1
csi-miRJL5	g235.t1
csi-miRJL5	g2364.t1
csi-miRJL5	g2382.t1
csi-miRJL5	g2387.t1
csi-miRJL5	g2390.t1
csi-miRJL5	g2393.t1
csi-miRJL5	g23.t1
csi-miRJL5	g2441.t1
csi-miRJL5	g2443.t1
csi-miRJL5	g2487.t1
csi-miRJL5	g2493.t1
csi-miRJL5	g2504.t1
csi-miRJL5	g2529.t1
csi-miRJL5	g2538.t1
csi-miRJL5	g2539.t1
csi-miRJL5	g2542.t1
csi-miRJL5	g2584.t1
csi-miRJL5	g258.t1
csi-miRJL5	g2594.t1
csi-miRJL5	g2603.t1
csi-miRJL5	g2605.t1
csi-miRJL5	g2617.t1
csi-miRJL5	g2625.t1
csi-miRJL5	g263.t1
csi-miRJL5	g2653.t1
csi-miRJL5	g2670.t1
csi-miRJL5	g2679.t1
csi-miRJL5	g2684.t1
csi-miRJL5	g2686.t1
csi-miRJL5	g2705.t1
csi-miRJL5	g2706.t1
csi-miRJL5	g2715.t1
csi-miRJL5	g2722.t1
csi-miRJL5	g2727.t1
csi-miRJL5	g2756.t1
csi-miRJL5	g2760.t1
csi-miRJL5	g2762.t1
csi-miRJL5	g2770.t1
csi-miRJL5	g2778.t1
csi-miRJL5	g2822.t1
csi-miRJL5	g2832.t1
csi-miRJL5	g2833.t1
csi-miRJL5	g2838.t1
csi-miRJL5	g2840.t1
csi-miRJL5	g2860.t1
csi-miRJL5	g2871.t1
csi-miRJL5	g2876.t1
csi-miRJL5	g2914.t1
csi-miRJL5	g291.t1
csi-miRJL5	g2923.t1
csi-miRJL5	g2961.t1
csi-miRJL5	g2972.t1
csi-miRJL5	g2989.t1
csi-miRJL5	g3002.t1
csi-miRJL5	g3035.t1
csi-miRJL5	g3055.t1
csi-miRJL5	g305.t1
csi-miRJL5	g3066.t1
csi-miRJL5	g30.t1
csi-miRJL5	g3109.t1
csi-miRJL5	g3115.t1
csi-miRJL5	g3116.t1
csi-miRJL5	g3126.t1
csi-miRJL5	g3128.t1
csi-miRJL5	g313.t1
csi-miRJL5	g3144.t1
csi-miRJL5	g3146.t1
csi-miRJL5	g3160.t1
csi-miRJL5	g3161.t1
csi-miRJL5	g3162.t1
csi-miRJL5	g3163.t1
csi-miRJL5	g3201.t1
csi-miRJL5	g3210.t1
csi-miRJL5	g3218.t1
csi-miRJL5	g3220.t1
csi-miRJL5	g3257.t1
csi-miRJL5	g3266.t1
csi-miRJL5	g3268.t1
csi-miRJL5	g3281.t1
csi-miRJL5	g3286.t1
csi-miRJL5	g3297.t1
csi-miRJL5	g3329.t1
csi-miRJL5	g3334.t1
csi-miRJL5	g3335.t1
csi-miRJL5	g3339.t1
csi-miRJL5	g333.t1
csi-miRJL5	g3341.t1
csi-miRJL5	g334.t1
csi-miRJL5	g3352.t1
csi-miRJL5	g3354.t1
csi-miRJL5	g3358.t1
csi-miRJL5	g3362.t1
csi-miRJL5	g3365.t1
csi-miRJL5	g3380.t1
csi-miRJL5	g3382.t1
csi-miRJL5	g3384.t1
csi-miRJL5	g3395.t1
csi-miRJL5	g3413.t1
csi-miRJL5	g3425.t1
csi-miRJL5	g3427.t1
csi-miRJL5	g3440.t1
csi-miRJL5	g3448.t1
csi-miRJL5	g3449.t1
csi-miRJL5	g3451.t1
csi-miRJL5	g3453.t1
csi-miRJL5	g3456.t1
csi-miRJL5	g3462.t1
csi-miRJL5	g3473.t1
csi-miRJL5	g3477.t1
csi-miRJL5	g3516.t1
csi-miRJL5	g3525.t1
csi-miRJL5	g3530.t1
csi-miRJL5	g3538.t1
csi-miRJL5	g353.t1
csi-miRJL5	g3540.t1
csi-miRJL5	g3569.t1
csi-miRJL5	g3570.t1
csi-miRJL5	g3573.t1
csi-miRJL5	g3590.t1
csi-miRJL5	g3602.t1
csi-miRJL5	g3610.t1
csi-miRJL5	g3619.t1
csi-miRJL5	g3620.t1
csi-miRJL5	g3636.t1
csi-miRJL5	g3650.t1
csi-miRJL5	g3662.t1
csi-miRJL5	g3678.t1
csi-miRJL5	g3680.t1
csi-miRJL5	g368.t1
csi-miRJL5	g369.t1
csi-miRJL5	g3706.t1
csi-miRJL5	g3710.t1
csi-miRJL5	g3744.t1
csi-miRJL5	g3746.t1
csi-miRJL5	g3749.t1
csi-miRJL5	g3824.t1
csi-miRJL5	g3825.t1
csi-miRJL5	g384.t1
csi-miRJL5	g3874.t1
csi-miRJL5	g3875.t1
csi-miRJL5	g3882.t1
csi-miRJL5	g3886.t1
csi-miRJL5	g3909.t1
csi-miRJL5	g391.t1
csi-miRJL5	g3920.t1
csi-miRJL5	g3921.t1
csi-miRJL5	g3923.t1
csi-miRJL5	g3945.t1
csi-miRJL5	g3957.t1
csi-miRJL5	g3972.t1
csi-miRJL5	g3977.t1
csi-miRJL5	g3985.t1
csi-miRJL5	g3999.t1
csi-miRJL5	g4001.t1
csi-miRJL5	g4013.t1
csi-miRJL5	g4017.t1
csi-miRJL5	g4031.t1
csi-miRJL5	g4058.t1
csi-miRJL5	g4066.t1
csi-miRJL5	g4081.t1
csi-miRJL5	g4085.t1
csi-miRJL5	g4087.t1
csi-miRJL5	g4118.t1
csi-miRJL5	g4125.t1
csi-miRJL5	g4135.t1
csi-miRJL5	g4161.t1
csi-miRJL5	g4168.t1
csi-miRJL5	g416.t1
csi-miRJL5	g4185.t1
csi-miRJL5	g4189.t1
csi-miRJL5	g4190.t1
csi-miRJL5	g4205.t1
csi-miRJL5	g4238.t1
csi-miRJL5	g4239.t1
csi-miRJL5	g4253.t1
csi-miRJL5	g4265.t1
csi-miRJL5	g4278.t1
csi-miRJL5	g4282.t1
csi-miRJL5	g4288.t1
csi-miRJL5	g4304.t1
csi-miRJL5	g4314.t1
csi-miRJL5	g4320.t1
csi-miRJL5	g4322.t1
csi-miRJL5	g433.t1
csi-miRJL5	g4356.t1
csi-miRJL5	g4374.t1
csi-miRJL5	g4383.t1
csi-miRJL5	g4392.t1
csi-miRJL5	g4413.t1
csi-miRJL5	g4415.t1
csi-miRJL5	g4443.t1
csi-miRJL5	g4447.t1
csi-miRJL5	g444.t1
csi-miRJL5	g4462.t1
csi-miRJL5	g4481.t1
csi-miRJL5	g4483.t1
csi-miRJL5	g4495.t1
csi-miRJL5	g4517.t1
csi-miRJL5	g4546.t1
csi-miRJL5	g455.t1
csi-miRJL5	g4560.t1
csi-miRJL5	g4562.t1
csi-miRJL5	g4565.t1
csi-miRJL5	g4570.t1
csi-miRJL5	g4602.t1
csi-miRJL5	g4617.t1
csi-miRJL5	g4619.t1
csi-miRJL5	g4623.t1
csi-miRJL5	g4634.t1
csi-miRJL5	g4655.t1
csi-miRJL5	g4670.t1
csi-miRJL5	g4699.t1
csi-miRJL5	g4706.t1
csi-miRJL5	g4707.t1
csi-miRJL5	g4716.t1
csi-miRJL5	g4734.t1
csi-miRJL5	g4769.t1
csi-miRJL5	g4787.t1
csi-miRJL5	g4789.t1
csi-miRJL5	g4792.t1
csi-miRJL5	g4794.t1
csi-miRJL5	g4811.t1
csi-miRJL5	g4820.t1
csi-miRJL5	g482.t1
csi-miRJL5	g4844.t1
csi-miRJL5	g484.t1
csi-miRJL5	g486.t1
csi-miRJL5	g4880.t1
csi-miRJL5	g4892.t1
csi-miRJL5	g4893.t1
csi-miRJL5	g4897.t1
csi-miRJL5	g48.t1
csi-miRJL5	g4969.t1
csi-miRJL5	g496.t1
csi-miRJL5	g4971.t1
csi-miRJL5	g4977.t1
csi-miRJL5	g4986.t1
csi-miRJL5	g4989.t1
csi-miRJL5	g4992.t1
csi-miRJL5	g4998.t1
csi-miRJL5	g5015.t1
csi-miRJL5	g5016.t1
csi-miRJL5	g5017.t1
csi-miRJL5	g5029.t1
csi-miRJL5	g5039.t1
csi-miRJL5	g5058.t1
csi-miRJL5	g5074.t1
csi-miRJL5	g5083.t1
csi-miRJL5	g5094.t1
csi-miRJL5	g5099.t1
csi-miRJL5	g5102.t1
csi-miRJL5	g5109.t1
csi-miRJL5	g5127.t1
csi-miRJL5	g5168.t1
csi-miRJL5	g5169.t1
csi-miRJL5	g5175.t1
csi-miRJL5	g5178.t1
csi-miRJL5	g5187.t1
csi-miRJL5	g5219.t1
csi-miRJL5	g5225.t1
csi-miRJL5	g5237.t1
csi-miRJL5	g5241.t1
csi-miRJL5	g5244.t1
csi-miRJL5	g5262.t1
csi-miRJL5	g5265.t1
csi-miRJL5	g5267.t1
csi-miRJL5	g5269.t1
csi-miRJL5	g5272.t1
csi-miRJL5	g5286.t1
csi-miRJL5	g5296.t1
csi-miRJL5	g5306.t1
csi-miRJL5	g5341.t1
csi-miRJL5	g5370.t1
csi-miRJL5	g5372.t1
csi-miRJL5	g537.t1
csi-miRJL5	g5398.t1
csi-miRJL5	g5404.t1
csi-miRJL5	g5423.t1
csi-miRJL5	g543.t1
csi-miRJL5	g5444.t1
csi-miRJL5	g5445.t1
csi-miRJL5	g5459.t1
csi-miRJL5	g547.t1
csi-miRJL5	g5513.t1
csi-miRJL5	g5537.t1
csi-miRJL5	g5540.t1
csi-miRJL5	g5595.t1
csi-miRJL5	g5613.t1
csi-miRJL5	g5617.t1
csi-miRJL5	g5621.t1
csi-miRJL5	g5626.t1
csi-miRJL5	g5674.t1
csi-miRJL5	g5688.t1
csi-miRJL5	g5712.t1
csi-miRJL5	g5736.t1
csi-miRJL5	g5740.t1
csi-miRJL5	g574.t1
csi-miRJL5	g5769.t1
csi-miRJL5	g5770.t1
csi-miRJL5	g5774.t1
csi-miRJL5	g577.t1
csi-miRJL5	g580.t1
csi-miRJL5	g5821.t1
csi-miRJL5	g5826.t1
csi-miRJL5	g5831.t1
csi-miRJL5	g5832.t1
csi-miRJL5	g5857.t1
csi-miRJL5	g5862.t1
csi-miRJL5	g5864.t1
csi-miRJL5	g586.t1
csi-miRJL5	g587.t1
csi-miRJL5	g5887.t1
csi-miRJL5	g5895.t1
csi-miRJL5	g5909.t1
csi-miRJL5	g5910.t1
csi-miRJL5	g5930.t1
csi-miRJL5	g5953.t1
csi-miRJL5	g596.t1
csi-miRJL5	g5989.t1
csi-miRJL5	g5999.t1
csi-miRJL5	g5.t1
csi-miRJL5	g6014.t1
csi-miRJL5	g6023.t1
csi-miRJL5	g6026.t1
csi-miRJL5	g6027.t1
csi-miRJL5	g6033.t1
csi-miRJL5	g6035.t1
csi-miRJL5	g6040.t1
csi-miRJL5	g6041.t1
csi-miRJL5	g6043.t1
csi-miRJL5	g6047.t1
csi-miRJL5	g6052.t1
csi-miRJL5	g6069.t1
csi-miRJL5	g6081.t1
csi-miRJL5	g6082.t1
csi-miRJL5	g6107.t1
csi-miRJL5	g6123.t1
csi-miRJL5	g6126.t1
csi-miRJL5	g6128.t1
csi-miRJL5	g6145.t1
csi-miRJL5	g6149.t1
csi-miRJL5	g615.t1
csi-miRJL5	g6186.t1
csi-miRJL5	g6189.t1
csi-miRJL5	g6225.t1
csi-miRJL5	g6226.t1
csi-miRJL5	g6228.t1
csi-miRJL5	g6237.t1
csi-miRJL5	g6244.t1
csi-miRJL5	g6245.t1
csi-miRJL5	g6248.t1
csi-miRJL5	g6249.t1
csi-miRJL5	g624.t1
csi-miRJL5	g6274.t1
csi-miRJL5	g6283.t1
csi-miRJL5	g6303.t1
csi-miRJL5	g6307.t1
csi-miRJL5	g6309.t1
csi-miRJL5	g6320.t1
csi-miRJL5	g6321.t1
csi-miRJL5	g6326.t1
csi-miRJL5	g6327.t1
csi-miRJL5	g6329.t1
csi-miRJL5	g6333.t1
csi-miRJL5	g6340.t1
csi-miRJL5	g6341.t1
csi-miRJL5	g6350.t1
csi-miRJL5	g6359.t1
csi-miRJL5	g6365.t1
csi-miRJL5	g6399.t1
csi-miRJL5	g63.t1
csi-miRJL5	g6407.t1
csi-miRJL5	g6425.t1
csi-miRJL5	g6429.t1
csi-miRJL5	g6447.t1
csi-miRJL5	g6454.t1
csi-miRJL5	g6458.t1
csi-miRJL5	g6470.t1
csi-miRJL5	g6472.t1
csi-miRJL5	g6520.t1
csi-miRJL5	g6535.t1
csi-miRJL5	g6536.t1
csi-miRJL5	g653.t1
csi-miRJL5	g6575.t1
csi-miRJL5	g6580.t1
csi-miRJL5	g6591.t1
csi-miRJL5	g6598.t1
csi-miRJL5	g6600.t1
csi-miRJL5	g660.t1
csi-miRJL5	g6611.t1
csi-miRJL5	g6615.t1
csi-miRJL5	g6621.t1
csi-miRJL5	g6630.t1
csi-miRJL5	g6633.t1
csi-miRJL5	g6639.t1
csi-miRJL5	g6652.t1
csi-miRJL5	g6670.t1
csi-miRJL5	g6683.t1
csi-miRJL5	g6717.t1
csi-miRJL5	g6719.t1
csi-miRJL5	g6725.t1
csi-miRJL5	g673.t1
csi-miRJL5	g6752.t1
csi-miRJL5	g6757.t1
csi-miRJL5	g6766.t1
csi-miRJL5	g6769.t1
csi-miRJL5	g6780.t1
csi-miRJL5	g6801.t1
csi-miRJL5	g6807.t1
csi-miRJL5	g6817.t1
csi-miRJL5	g6822.t1
csi-miRJL5	g6825.t1
csi-miRJL5	g6826.t1
csi-miRJL5	g6828.t1
csi-miRJL5	g6834.t1
csi-miRJL5	g6837.t1
csi-miRJL5	g6841.t1
csi-miRJL5	g6842.t1
csi-miRJL5	g6847.t1
csi-miRJL5	g6860.t1
csi-miRJL5	g6870.t1
csi-miRJL5	g6874.t1
csi-miRJL5	g6886.t1
csi-miRJL5	g6893.t1
csi-miRJL5	g6897.t1
csi-miRJL5	g6901.t1
csi-miRJL5	g6915.t1
csi-miRJL5	g6921.t1
csi-miRJL5	g6929.t1
csi-miRJL5	g6946.t1
csi-miRJL5	g6974.t1
csi-miRJL5	g6982.t1
csi-miRJL5	g6987.t1
csi-miRJL5	g6996.t1
csi-miRJL5	g6998.t1
csi-miRJL5	g69.t1
csi-miRJL5	g6.t1
csi-miRJL5	g7036.t1
csi-miRJL5	g7048.t1
csi-miRJL5	g7060.t1
csi-miRJL5	g7063.t1
csi-miRJL5	g7069.t1
csi-miRJL5	g7073.t1
csi-miRJL5	g7083.t1
csi-miRJL5	g7085.t1
csi-miRJL5	g7089.t1
csi-miRJL5	g7097.t1
csi-miRJL5	g7098.t1
csi-miRJL5	g7131.t1
csi-miRJL5	g7139.t1
csi-miRJL5	g7147.t1
csi-miRJL5	g7151.t1
csi-miRJL5	g7162.t1
csi-miRJL5	g7184.t1
csi-miRJL5	g7203.t1
csi-miRJL5	g7209.t1
csi-miRJL5	g7213.t1
csi-miRJL5	g7221.t1
csi-miRJL5	g7258.t1
csi-miRJL5	g7262.t1
csi-miRJL5	g7271.t1
csi-miRJL5	g7285.t1
csi-miRJL5	g7286.t1
csi-miRJL5	g728.t1
csi-miRJL5	g7299.t1
csi-miRJL5	g7319.t1
csi-miRJL5	g7323.t1
csi-miRJL5	g733.t1
csi-miRJL5	g7342.t1
csi-miRJL5	g7344.t1
csi-miRJL5	g7375.t1
csi-miRJL5	g7390.t1
csi-miRJL5	g73.t1
csi-miRJL5	g7402.t1
csi-miRJL5	g7409.t1
csi-miRJL5	g7412.t1
csi-miRJL5	g7430.t1
csi-miRJL5	g7475.t1
csi-miRJL5	g7479.t1
csi-miRJL5	g7480.t1
csi-miRJL5	g7483.t1
csi-miRJL5	g7492.t1
csi-miRJL5	g749.t1
csi-miRJL5	g7505.t1
csi-miRJL5	g7516.t1
csi-miRJL5	g752.t1
csi-miRJL5	g7566.t1
csi-miRJL5	g7619.t1
csi-miRJL5	g7623.t1
csi-miRJL5	g762.t1
csi-miRJL5	g763.t1
csi-miRJL5	g7643.t1
csi-miRJL5	g7705.t1
csi-miRJL5	g7719.t1
csi-miRJL5	g7738.t1
csi-miRJL5	g773.t1
csi-miRJL5	g7749.t1
csi-miRJL5	g774.t1
csi-miRJL5	g7752.t1
csi-miRJL5	g7780.t1
csi-miRJL5	g7801.t1
csi-miRJL5	g7856.t1
csi-miRJL5	g7857.t1
csi-miRJL5	g7866.t1
csi-miRJL5	g7889.t1
csi-miRJL5	g788.t1
csi-miRJL5	g7900.t1
csi-miRJL5	g7906.t1
csi-miRJL5	g7947.t1
csi-miRJL5	g7949.t1
csi-miRJL5	g796.t1
csi-miRJL5	g797.t1
csi-miRJL5	g7981.t1
csi-miRJL5	g7984.t1
csi-miRJL5	g8017.t1
csi-miRJL5	g8028.t1
csi-miRJL5	g8039.t1
csi-miRJL5	g8046.t1
csi-miRJL5	g8054.t1
csi-miRJL5	g805.t1
csi-miRJL5	g8060.t1
csi-miRJL5	g8073.t1
csi-miRJL5	g8075.t1
csi-miRJL5	g8086.t1
csi-miRJL5	g8115.t1
csi-miRJL5	g818.t1
csi-miRJL5	g8197.t1
csi-miRJL5	g8219.t1
csi-miRJL5	g8224.t1
csi-miRJL5	g8226.t1
csi-miRJL5	g8228.t1
csi-miRJL5	g8229.t1
csi-miRJL5	g8238.t1
csi-miRJL5	g8269.t1
csi-miRJL5	g8274.t1
csi-miRJL5	g8282.t1
csi-miRJL5	g8284.t1
csi-miRJL5	g8285.t1
csi-miRJL5	g8295.t1
csi-miRJL5	g8296.t1
csi-miRJL5	g82.t1
csi-miRJL5	g8300.t1
csi-miRJL5	g8301.t1
csi-miRJL5	g8311.t1
csi-miRJL5	g8323.t1
csi-miRJL5	g8324.t1
csi-miRJL5	g8343.t1
csi-miRJL5	g8351.t1
csi-miRJL5	g8362.t1
csi-miRJL5	g8365.t1
csi-miRJL5	g8396.t1
csi-miRJL5	g8426.t1
csi-miRJL5	g844.t1
csi-miRJL5	g8457.t1
csi-miRJL5	g8469.t1
csi-miRJL5	g8471.t1
csi-miRJL5	g8509.t1
csi-miRJL5	g8515.t1
csi-miRJL5	g8519.t1
csi-miRJL5	g8525.t1
csi-miRJL5	g8541.t1
csi-miRJL5	g8553.t1
csi-miRJL5	g8557.t1
csi-miRJL5	g8561.t1
csi-miRJL5	g8563.t1
csi-miRJL5	g8570.t1
csi-miRJL5	g8577.t1
csi-miRJL5	g8581.t1
csi-miRJL5	g8594.t1
csi-miRJL5	g8607.t1
csi-miRJL5	g860.t1
csi-miRJL5	g8612.t1
csi-miRJL5	g8621.t1
csi-miRJL5	g8623.t1
csi-miRJL5	g8643.t1
csi-miRJL5	g8647.t1
csi-miRJL5	g8654.t1
csi-miRJL5	g8670.t1
csi-miRJL5	g8685.t1
csi-miRJL5	g8729.t1
csi-miRJL5	g8764.t1
csi-miRJL5	g8796.t1
csi-miRJL5	g8808.t1
csi-miRJL5	g8813.t1
csi-miRJL5	g8823.t1
csi-miRJL5	g8828.t1
csi-miRJL5	g8873.t1
csi-miRJL5	g8903.t1
csi-miRJL5	g8908.t1
csi-miRJL5	g892.t1
csi-miRJL5	g8963.t1
csi-miRJL5	g896.t1
csi-miRJL5	g8977.t1
csi-miRJL5	g898.t1
csi-miRJL5	g8992.t1
csi-miRJL5	g899.t1
csi-miRJL5	g9011.t1
csi-miRJL5	g9018.t1
csi-miRJL5	g901.t1
csi-miRJL5	g9033.t1
csi-miRJL5	g9035.t1
csi-miRJL5	g9048.t1
csi-miRJL5	g9063.t1
csi-miRJL5	g9087.t1
csi-miRJL5	g9105.t1
csi-miRJL5	g9106.t1
csi-miRJL5	g911.t1
csi-miRJL5	g9121.t1
csi-miRJL5	g9138.t1
csi-miRJL5	g913.t1
csi-miRJL5	g9142.t1
csi-miRJL5	g9175.t1
csi-miRJL5	g9197.t1
csi-miRJL5	g9199.t1
csi-miRJL5	g9201.t1
csi-miRJL5	g9203.t1
csi-miRJL5	g9205.t1
csi-miRJL5	g9214.t1
csi-miRJL5	g921.t1
csi-miRJL5	g9226.t1
csi-miRJL5	g9227.t1
csi-miRJL5	g9229.t1
csi-miRJL5	g9230.t1
csi-miRJL5	g9252.t1
csi-miRJL5	g9253.t1
csi-miRJL5	g9260.t1
csi-miRJL5	g9265.t1
csi-miRJL5	g9266.t1
csi-miRJL5	g9267.t1
csi-miRJL5	g9271.t1
csi-miRJL5	g9275.t1
csi-miRJL5	g928.t1
csi-miRJL5	g929.t1
csi-miRJL5	g92.t1
csi-miRJL5	g9303.t1
csi-miRJL5	g9314.t1
csi-miRJL5	g9315.t1
csi-miRJL5	g9316.t1
csi-miRJL5	g9326.t1
csi-miRJL5	g9327.t1
csi-miRJL5	g932.t1
csi-miRJL5	g9333.t1
csi-miRJL5	g9338.t1
csi-miRJL5	g9354.t1
csi-miRJL5	g935.t1
csi-miRJL5	g9388.t1
csi-miRJL5	g9395.t1
csi-miRJL5	g9400.t1
csi-miRJL5	g9406.t1
csi-miRJL5	g946.t1
csi-miRJL5	g947.t1
csi-miRJL5	g9484.t1
csi-miRJL5	g948.t1
csi-miRJL5	g94.t1
csi-miRJL5	g9525.t1
csi-miRJL5	g9551.t1
csi-miRJL5	g9578.t1
csi-miRJL5	g9581.t1
csi-miRJL5	g9595.t1
csi-miRJL5	g9621.t1
csi-miRJL5	g9657.t1
csi-miRJL5	g9668.t1
csi-miRJL5	g9675.t1
csi-miRJL5	g9700.t1
csi-miRJL5	g9710.t1
csi-miRJL5	g972.t1
csi-miRJL5	g9751.t1
csi-miRJL5	g9765.t1
csi-miRJL5	g9772.t1
csi-miRJL5	g9776.t1
csi-miRJL5	g9783.t1
csi-miRJL5	g9795.t1
csi-miRJL5	g9804.t1
csi-miRJL5	g9834.t1
csi-miRJL5	g9853.t1
csi-miRJL5	g9878.t1
csi-miRJL5	g9881.t1
csi-miRJL5	g9887.t1
csi-miRJL5	g9891.t1
csi-miRJL5	g990.t1
csi-miRJL5	g9924.t1
csi-miRJL5	g9952.t1
csi-miRJL5	g9964.t1
csi-miRJL5	g99.t1
